# Supplementary material
Source: publisher figshare collection journal article supplement (https://tandf.figshare.com/ndownloader/files/18112394)
Supplement: Supplementary file 1 [file 18112394]

## SUPPLEMENTARY MATERIAL

### Appendix A: Proofs of the Main Theorems

For convenience, we introduce the following additional notation that will be used throughout the Appendix.

- i. Let  $\tilde{W}$  denote the difference between the sample covariance matrix  $S$  and the true covariance matrix  $\Sigma^0 = (\Theta^0)^{-1}$  and  $\Delta$  the difference between an estimate  $\tilde{\Theta}$  and the true precision matrix  $\Theta^0$ . That is,

$$\begin{aligned}\tilde{W} &= S - \Sigma^0 \\ \Delta &= \tilde{\Theta} - \Theta^0.\end{aligned}$$

- ii. Let  $R(\Delta)$  denote the difference between  $n\tilde{\Theta}^{-1}/2$ , the gradient of  $n \log \det(\tilde{\Theta})/2$ , and its first-order Taylor expansion at  $\Theta^0$ :

$$R(\Delta) = \frac{n}{2} \left( \tilde{\Theta}^{-1} - \Sigma^0 + \Sigma^0 \Delta \Sigma^0 \right).$$

- iii. Recall our objective function

$$L(\Theta) = \frac{n}{2} \left( \text{tr}(S\Theta) - \log \det(\Theta) \right) + \frac{1}{2} \sum_{i,j} \text{pen}_{SS}(\theta_{ij}) + \sum_i \text{pen}_1(\theta_{ii}),$$

where

$$\text{pen}_{SS}(\theta_{ij}) = -\log \left[ \left( \frac{\eta}{2v_1} \right) e^{-\frac{|\theta_{ij}|}{v_1}} + \left( \frac{1-\eta}{2v_0} \right) e^{-\frac{|\theta_{ij}|}{v_0}} \right], \text{ and } \text{pen}_1(\theta_{ii}) = \tau |\theta_{ii}|$$

denote the penalty terms on  $\theta_{ij}$  ( $i \neq j$ ) and  $\theta_{ii}$ , respectively.

Let  $Z_{ij}$  denote the subgradient of the penalty term with respect to  $\theta_{ij}$ :

$$Z_{ij} = Z_{ij}(\theta_{ij}) = \begin{cases} \tau & \text{if } i = j \\ \frac{1}{2} \text{pen}'_{SS}(\theta_{ij}) & \text{if } i \neq j, \quad \theta_{ij} \neq 0 \\ [-1, 1] \times \frac{\frac{\eta}{2v_1} + \frac{1-\eta}{2v_0}}{\frac{\eta}{v_1} + \frac{1-\eta}{v_0}} & \text{if } i \neq j, \quad \theta_{ij} = 0 \end{cases}$$

where

$$\text{pen}'_{SS}(\theta_{ij}) = \frac{\frac{\eta}{2v_1^2}e^{-\frac{|\theta_{ij}|}{v_1}} + \frac{1-\eta}{2v_0^2}e^{-\frac{|\theta_{ij}|}{v_0}}}{\frac{\eta}{2v_1}e^{-\frac{|\theta_{ij}|}{v_1}} + \frac{1-\eta}{2v_0}e^{-\frac{|\theta_{ij}|}{v_0}}} \text{sign}(\theta_{ij}).$$

Let  $Z = [Z_{ij}]$ , then the subgradient of the objective function  $L(\Theta)$  is

$$\partial L(\Theta) = \frac{n}{2} (S - \Theta^{-1}) + Z.$$

iv. We denote the index set of diagonal entries as  $\mathcal{D} := \{(i, j) : i = j\}$ . For any subset  $\mathcal{S}$  of  $\{(i, j) : 1 \leq i, j \leq p\}$  and  $p \times p$  matrix  $A$ , we use  $A_{\mathcal{S}}$  to denote the submatrix of  $A$  with entries indexed by  $\mathcal{S}$ .

In this Appendix, we first prove the following main result.

**Theorem A.** Assume condition (A1) and  $\|\tilde{W}\|_{\infty} = \max_{ij} |s_{ij} - \sigma_{ij}^0| \leq C_1 \sqrt{\log p/n}$ . If (i) the prior hyper-parameters  $v_0, v_1, \eta$  and  $\tau$  satisfy:

$$\begin{cases} \frac{1}{nv_1} = C_3 \sqrt{\frac{\log p}{n}} (1 - \varepsilon_1), \text{ where } C_3 < C_2, \varepsilon_1 > 0, \\ \frac{1}{nv_0} > C_4 \sqrt{\frac{\log p}{n}}, \\ \frac{v_1^2(1-\eta)}{v_0^2\eta} \leq \varepsilon_1 p^{2(C_2-C_3)M_{\Gamma^0}[C_4-C_3]}, \\ \tau \leq C_3 \frac{n}{2} \sqrt{\frac{\log p}{n}}, \end{cases} \quad (1)$$

where  $C_4 = (C_1 + M_{\Sigma^0}^2 2(C_1 + C_3)M_{\Gamma^0} + 6(C_1 + C_3)^2 dM_{\Gamma^0}^2 M_{\Sigma^0}^3 / M)$ ,

(ii) the spectral norm  $B$  satisfies  $1/k_1 + 2d(C_1 + C_3)M_{\Gamma^0} \sqrt{\log p/n} < B < (2nv_0)^{\frac{1}{2}}$ , and

(iii) the sample size  $n$  satisfies  $\sqrt{n} \geq M \sqrt{\log p}$ , where

$$M = \max \left\{ 2d(C_1 + C_3)M_{\Gamma^0} \max \left( 3M_{\Sigma^0}, 3M_{\Gamma^0}M_{\Sigma^0}^3, 2/k_1^2 \right), 2C_3\varepsilon_1/k_1^2 \right\},$$

then the MAP estimator  $\tilde{\Theta}$  satisfies

$$\|\tilde{\Theta} - \Theta^0\|_{\infty} < 2(C_1 + C_3)M_{\Gamma^0} \sqrt{\frac{\log p}{n}}.$$

Before presenting our proof, we list two preliminary results as lemmas and list some properties of the penalty function  $\text{pen}_{SS}(\delta)$ , which will be useful. Proofs of these lemmas are in Appendix B.

**Lemma 1.** Define  $r := \max \left\{ 2M_{\Gamma^0} \left( \|\tilde{W}\|_\infty + \frac{2}{n} \max(\frac{1}{2}\text{pen}'_{SS}(\delta), \tau) \right), 2(C_1 + C_3)M_{\Gamma^0} \sqrt{\frac{\log p}{n}} \right\}$ , and  $\mathcal{A} := \left\{ \Theta : \frac{n}{2} (S - \Theta^{-1})_B + Z_B = 0, \Theta \succ 0, \|\Theta\|_2 \leq B \right\}$  with  $\mathcal{B} = \{(i, j) : |\theta_{ij}^0| > 2(C_1 + C_3)M_{\Gamma^0} \sqrt{\log p/n}\} \cup \mathcal{D}$ . If parameters  $r$  and  $B$  satisfy:

$$\begin{cases} r \leq \min \left\{ \frac{1}{3M_{\Sigma^0 d}}, \frac{1}{3dM_{\Gamma^0} M_{\Sigma^0}^3} \right\}, \\ \min |\theta_{B \cap \mathcal{D}^c}^0| \geq r + \delta, \\ 1/k_1 + dr < B, \end{cases}$$

for some  $\delta > 0$ , where  $k_1$  is the lower bound on  $\lambda_{\min}(\Sigma^0)$ , then the set  $\mathcal{A}$  is non-empty. Moreover, there exists a  $\tilde{\Theta} \in \mathcal{A}$  such that  $\|\Delta\|_\infty := \|\tilde{\Theta} - \Theta^0\|_\infty \leq r$ .

**Lemma 2.** Suppose that  $\|\tilde{\Theta} - \Theta^0\|_\infty \leq r$ , then

$$\|\tilde{\Theta} - \Theta^0\|_F \leq r\sqrt{p+s}, \quad (2)$$

$$\left\| \tilde{\Theta} - \Theta^0 \right\|_\infty, \|\tilde{\Theta} - \Theta^0\|_2 \leq r \min\{d, \sqrt{p+s}\}, \text{ and} \quad (3)$$

$$\|\tilde{\Theta}^{-1} - \Sigma^0\|_\infty \leq M_{\Sigma^0}^2 r + \frac{3}{2} d M_{\Sigma^0}^3 r^2. \quad (4)$$

### Properties of $\text{pen}_{SS}(\delta)$

We now provide some useful results on the penalty function  $\text{pen}_{SS}(\delta)$ .

- Bound on the magnitude of the first derivative of  $\text{pen}_{SS}(\delta)$ :

$$\begin{aligned} \frac{1}{n} |\text{pen}'_{SS}(\delta)| &= \frac{\frac{\eta}{2v_1^2} e^{-\frac{|\delta|}{v_1}} + \frac{1-\eta}{2v_0^2} e^{-\frac{|\delta|}{v_0}}}{n \left( \frac{\eta}{2v_1} e^{-\frac{|\delta|}{v_1}} + \frac{1-\eta}{2v_0} e^{-\frac{|\delta|}{v_0}} \right)} \\ &= \frac{1}{nv_1} + \frac{\frac{1}{n} \left( \frac{1}{v_0} - \frac{1}{v_1} \right)}{\frac{\eta v_0}{(1-\eta)v_1} e^{\frac{|\delta|}{v_0}} - \frac{|\delta|}{v_1} + 1} \\ &< \frac{1}{nv_1} \left( 1 + \frac{\frac{v_1^2(1-\eta)}{v_0^2 \eta}}{e^{\frac{|\delta|}{v_0}} - \frac{|\delta|}{v_1}} \right). \end{aligned} \quad (5)$$

Choose  $1/(nv_0) > C_4\sqrt{\log p/n}$  and  $1/(nv_1) < C_3\sqrt{\log p/n}$  as in Theorem A, and if further let  $v_1^2(1-\eta)/(v_0^2\eta) = \xi p^{\psi[C_4-C_3]}$ , when  $\delta \geq \psi\sqrt{\log p/n}$ , then we have

$$\frac{\frac{v_1^2(1-\eta)}{v_0^2\eta}}{e^{\frac{|\delta|}{v_0} - \frac{|\delta|}{v_1}}} \leq \frac{\xi p^{\psi[C_4-C_3]}}{p^{\psi[C_4-C_3]}} \leq \xi. \quad (6)$$

Let  $\xi$  to be sufficiently small, i.e.,  $\xi < \varepsilon_1$ , then we have

$$\frac{1}{n}|\text{pen}'_{SS}(\delta)| < C_3\sqrt{\frac{\log p}{n}}.$$

- Bound on the magnitude of the second derivative of  $\text{pen}_{SS}(\delta)$ :

With the same choice of  $v_0$  and  $v_1$  as in Theorem A, when  $\delta \geq \psi\sqrt{\log p/n}$ , we have

$$\begin{aligned} \frac{1}{2n}|\text{pen}''_{SS}(\delta)| &= \frac{\left(\frac{1}{v_0} - \frac{1}{v_1}\right) \frac{\eta v_0}{(1-\eta)v_1} e^{\frac{\delta}{v_0} - \frac{\delta}{v_1}}}{2n \left(\frac{\eta v_0}{(1-\eta)v_1} e^{\frac{\delta}{v_0} - \frac{\delta}{v_1}} + 1\right)^2} \\ &< \frac{\left(\frac{1}{v_0} - \frac{1}{v_1}\right)}{2n \left(\frac{\eta v_0}{(1-\eta)v_1} e^{\frac{\delta}{v_0} - \frac{\delta}{v_1}} + 1\right)} \\ &< \frac{(1-\eta)v_1}{2nv_0^2\eta e^{\frac{\delta}{v_0} - \frac{\delta}{v_1}}} < \frac{\xi}{2nv_1} \end{aligned} \quad (7)$$

$$< \frac{C_3}{2}\xi\sqrt{\frac{\log p}{n}} < \frac{C_3}{2}\varepsilon_1\sqrt{\frac{\log p}{n}}, \quad (8)$$

where (7) is due to (6). In addition, when  $n$  satisfies the condition (iii) in Theorem A, (8) is always upper bounded by  $\frac{1}{4}k_1^2$ .

**Proof of Theorem A.** Our proof is inspired by the techniques from Rothman et al. (2008) and Ravikumar et al. (2011).

Here is the outline of the proof.

- *Step 1:* Construct a solution set  $\mathcal{A}$  for the constraint problem:

$$\arg \min_{\Theta \succ 0, \|\Theta\|_2 \leq B, \Theta_{B^c} = 0} L(\Theta),$$

by defining

$$\mathcal{A} = \left\{ \Theta : \frac{n}{2} (S - \Theta^{-1})_B + Z_B = 0, \Theta \succ 0, \|\Theta\|_2 \leq B \right\},$$

where  $\mathcal{B} = \{(i, j) : |\theta_{ij}^0| > 2(C_1 + C_3)M_{\Gamma^0}\sqrt{\log p/n}\} \cup \mathcal{D}$ . For  $\theta_{ij}^0 \in \mathcal{B} \cap \mathcal{D}^c$  and , define  $\min(|\theta_{ij}^0|)$  as  $2(C_1 + C_2)M_{\Gamma^0}\sqrt{\log p/n}$ . We then have  $|\theta_{ij}^0| \geq 2(C_1 + C_2)M_{\Gamma^0}\sqrt{\log p/n}$  when  $\theta_{ij}^0 \in \mathcal{B} \cap \mathcal{D}^c$  and  $|\theta_{ij}^0| \leq 2(C_1 + C_3)M_{\Gamma^0}\sqrt{\log p/n}$  when  $\theta_{ij}^0 \in \mathcal{B}^c \cap \mathcal{D}^c$ .

- *Step 2:* Prove  $\mathcal{A}$  is not empty and further show that there exists  $\tilde{\Theta} \in \mathcal{A}$  satisfying  $\|\tilde{\Theta} - \Theta^0\|_\infty = O_p\left(\sqrt{\log p/n}\right)$ .
- *Step 3:* Finally prove that  $\tilde{\Theta}$ , which is positive definite by construction, is a local minimizer of the loss function  $L(\Theta)$  by showing  $L(\Theta) \geq L(\tilde{\Theta})$  for any  $\Theta$  in a small neighborhood of  $\tilde{\Theta}$ . Since  $L(\Theta)$  is strictly convex when  $B < (2nv_0)^{\frac{1}{2}}$ , we then conclude that  $\tilde{\Theta}$  is the unique minimizer such that  $\|\tilde{\Theta} - \Theta^0\|_\infty = O_p\left(\sqrt{\log p/n}\right)$ .

At *Step 2*, we apply Lemma 1. First we check its conditions.

1. Consider  $r = 2(C_1 + C_3)M_{\Gamma^0}\sqrt{\log p/n}$ . For  $\theta_{ij}^0 \in \mathcal{B} \cap \mathcal{D}^c$ , we have  $\theta_{ij}^0 \geq r + 2(C_2 - C_3)M_{\Gamma^0}\sqrt{\log p/n}$ . That is, the  $\delta$  defined in Lemma 1 is greater or equal to  $2(C_2 - C_3)M_{\Gamma^0}\sqrt{\log p/n}$ .
2. Recall the properties of  $\text{pen}_{SS}(\delta)$ . We have  $|\text{pen}'_{SS}(\delta)|/n < C_3\sqrt{\log p/n}$ . With the bound of  $\|\tilde{W}\|_\infty$  and the condition on sample size  $n$ , we have

$$\begin{aligned} 2M_{\Gamma^0} \left( \|W\|_\infty + \max \left( \frac{1}{n} \text{pen}'_{SS}(\delta), \frac{2}{n} \tau \right) \right) &\leq 2(C_1 + C_3)M_{\Gamma^0} \sqrt{\frac{\log p}{n}} \\ &\leq \min \left\{ \frac{1}{3M_{\Sigma^0}d}, \frac{1}{\frac{3}{2}dM_{\Gamma^0}M_{\Sigma^0}^3} \right\}. \end{aligned}$$

Thus, conditions for Lemma 1 are all satisfied. By Lemma 1, we conclude that there exists a solution  $\tilde{\Theta} \in \mathcal{A}$  satisfying

$$\|\tilde{\Theta} - \Theta^0\|_\infty = \|\Delta\|_\infty \leq 2(C_1 + C_3)M_{\Gamma^0} \sqrt{\frac{\log p}{n}}.$$

That is, the solution  $\tilde{\Theta}$  we constructed is  $O_p\left(\sqrt{\log p/n}\right)$  from the truth in entrywise  $l_\infty$  norm.

At *Step 3*, we need to show that the solution  $\tilde{\Theta}$  we constructed is indeed a local minimizer of the objective function  $L(\Theta)$ . It suffices to show that

$$G(\Delta_1) = L(\tilde{\Theta} + \Delta_1) - L(\tilde{\Theta}) \geq 0$$

for any  $\Delta_1$  with  $\|\Delta_1\|_\infty \leq \epsilon$ . Re-organize  $G(\Delta_1)$  as follows:

$$\begin{aligned}
G(\Delta_1) &= \frac{n}{2} \left( \text{tr} \left( \Delta_1 \left( S - \tilde{\Theta}^{-1} \right) \right) - \left( \log |\tilde{\Theta} + \Delta_1| - \log |\tilde{\Theta}| \right) + \text{tr} \left( \Delta_1 \tilde{\Theta}^{-1} \right) \right) \\
&\quad - \sum_{i < j} \log \left( \frac{\eta}{2v_1} e^{-\frac{|\tilde{\theta}_{ij} + \Delta_{1ij}|}{v_1}} + \frac{1 - \eta}{2v_0} e^{-\frac{|\tilde{\theta}_{ij} + \Delta_{1ij}|}{v_0}} \right) \\
&\quad + \sum_{i < j} \log \left( \frac{\eta}{2v_1} e^{-\frac{|\tilde{\theta}_{ij}|}{v_1}} + \frac{1 - \eta}{2v_0} e^{-\frac{|\tilde{\theta}_{ij}|}{v_0}} \right) + \tau \sum_i \left( \tilde{\theta}_{ii} + \Delta_1 - \tilde{\theta}_{ii} \right) \\
&= \text{(I)} + \text{(II)} + \text{(III)},
\end{aligned}$$

where

$$\begin{aligned}
\text{(I)} &= \frac{n}{2} \left( \text{tr} \left( \Delta_1 \left( S - \tilde{\Theta}^{-1} \right) \right) - \left( \log |\tilde{\Theta} + \Delta_1| - \log |\tilde{\Theta}| \right) + \text{tr} \left( \Delta_1 \tilde{\Theta}^{-1} \right) \right), \\
\text{(II)} &= -\frac{1}{2} \sum_{i < j} \log \left( \frac{\eta}{2v_1} e^{-\frac{|\tilde{\theta}_{ij} + \Delta_{1ij}|}{v_1}} + \frac{1 - \eta}{2v_0} e^{-\frac{|\tilde{\theta}_{ij} + \Delta_{1ij}|}{v_0}} \right) \\
&\quad + \frac{1}{2} \sum_{i < j} \log \left( \frac{\eta}{2v_1} e^{-\frac{|\tilde{\theta}_{ij}|}{v_1}} + \frac{1 - \eta}{2v_0} e^{-\frac{|\tilde{\theta}_{ij}|}{v_0}} \right), \\
\text{(III)} &= \tau \sum_i \left( \tilde{\theta}_{ii} + \Delta_{1ii} - \tilde{\theta}_{ii} \right) = \tau \Delta_{1ii}.
\end{aligned}$$

Bound (I) as follows.

$$\begin{aligned}
&\log |\tilde{\Theta} + \Delta_1| - \log |\tilde{\Theta}| \\
&= \text{tr} \left( \Delta_1 \tilde{\Theta}^{-1} \right) - \text{vec}(\Delta_1)^T \int_0^1 (1 - v) \left( (\tilde{\Theta}^{-1} + v\Delta_1)^{-1} \otimes (\tilde{\Theta}^{-1} + v\Delta_1)^{-1} dv \right) \text{vec}(\Delta_1) \\
&\leq \text{tr} \left( \Delta_1 \tilde{\Theta}^{-1} \right) - \frac{1}{4} k_1^2 \|\Delta_1\|_F^2.
\end{aligned}$$

where the last inequality can be shown with the same proof for Theorem 1 in [Rothman et al. \(2008\)](#) with  $\sqrt{n} \geq 4(C_1 + C_3)dM_{\Gamma^0}/k_1^2\sqrt{\log p}$ . Thus,

$$\begin{aligned}
\text{(I)} &\geq \frac{n}{2} \left( \text{tr} \left( \Delta_1 \left( S - \tilde{\Theta}^{-1} \right) \right) + \frac{1}{4} k_1^2 \|\Delta_1\|_F^2 \right) \\
&= \frac{n}{2} \left( \sum_{i,j} \left( \Delta_{1ij} \left( s_{ij} - \tilde{\Theta}_{ij}^{-1} \right) \right) + \frac{1}{4} k_1^2 \|\Delta_1\|_F^2 \right).
\end{aligned}$$

Next consider (II). For any  $(i, j) \notin \mathcal{B}$ ,  $\tilde{\theta}_{ij} = 0$ ,  $|\tilde{\theta}_{ij} + \Delta_{1ij}| = |\Delta_{1ij}|$ , and therefore

$$\begin{aligned}
& -\log \left( \frac{\eta}{2v_1} e^{-\frac{|\tilde{\theta}_{ij} + \Delta_{1ij}|}{v_1}} + \frac{1-\eta}{2v_0} e^{-\frac{|\tilde{\theta}_{ij} + \Delta_{1ij}|}{v_0}} \right) + \log \left( \frac{\eta}{2v_1} e^{-\frac{|\tilde{\theta}_{ij}|}{v_1}} + \frac{1-\eta}{2v_0} e^{-\frac{|\tilde{\theta}_{ij}|}{v_0}} \right) \\
&= \log \frac{\left( \frac{\eta}{2v_1} e^{-\frac{|0|}{v_1}} \right) + \left( \frac{1-\eta}{2v_0} e^{-\frac{|0|}{v_0}} \right)}{\left( \frac{\eta}{2v_1} e^{-\frac{|\Delta_{1ij}|}{v_1}} \right) + \left( \frac{1-\eta}{2v_0} e^{-\frac{|\Delta_{1ij}|}{v_0}} \right)} \\
&= \frac{|\Delta_{1ij}|}{v_0} - \log \left( \frac{v_0 \eta e^{\frac{|\Delta_{1ij}|}{v_0} - \frac{|\Delta_{1ij}|}{v_1}} + v_1(1-\eta)}{v_0 \eta + v_1(1-\eta)} \right).
\end{aligned}$$

For any  $(i, j) \in \mathcal{B}$  and  $i \neq j$ , applying Taylor expansion, for some  $v \in (0, 1)$ , we have

$$\begin{aligned}
& -\log \left( \frac{\eta}{2v_1} e^{-\frac{|\tilde{\theta}_{ij} + \Delta_{1ij}|}{v_1}} + \frac{1-\eta}{2v_0} e^{-\frac{|\tilde{\theta}_{ij} + \Delta_{1ij}|}{v_0}} \right) + \log \left( \frac{\eta}{2v_1} e^{-\frac{|\tilde{\theta}_{ij}|}{v_1}} + \frac{1-\eta}{2v_0} e^{-\frac{|\tilde{\theta}_{ij}|}{v_0}} \right) \\
&= \text{pen}_{SS}'(\tilde{\theta}_{ij}) \Delta_{1ij} + \frac{1}{2} \text{pen}_{SS}''(\tilde{\theta}_{ij} + v \Delta_{1ij}) \Delta_{1ij}^2.
\end{aligned}$$

Combining the results above, we have

$$\begin{aligned}
G(\Delta_1) &\geq \frac{n}{2} \left( \sum_{i,j} \left( \Delta_{1ij} (s_{ij} - \tilde{\Theta}_{ij}^{-1}) \right) + \frac{1}{4} k_1^2 \|\Delta_1\|_F^2 \right) + \sum_{i=j, \in \mathcal{B}} \tau \Delta_{1ii} \\
&\quad + \frac{1}{2} \sum_{i \neq j, \in \mathcal{B}} \left( \text{pen}_{SS}'(\tilde{\theta}_{ij}) \Delta_{1ij} + \frac{1}{2} \text{pen}_{SS}''(\tilde{\theta}_{ij} + v \Delta_{1ij}) \Delta_{1ij}^2 \right) \\
&\quad - \frac{1}{2} \sum_{\notin \mathcal{B}} \left( -\frac{|\Delta_{1ij}|}{v_0} + \log \left( \frac{v_0 \eta e^{\frac{|\Delta_{1ij}|}{v_0} - \frac{|\Delta_{1ij}|}{v_1}} + v_1(1-\eta)}{v_0 \eta + v_1(1-\eta)} \right) \right) \\
&= (\text{A}) + (\text{B}) + (\text{C}),
\end{aligned}$$

where

$$\begin{aligned}
(\text{A}) &= \frac{n}{2} \left( \sum_{(i,j) \in \mathcal{B}} \Delta_{1ij} (s_{ij} - \tilde{\Theta}_{ij}^{-1} + \frac{2}{n} Z_{ij}) \right), \\
(\text{B}) &= \frac{n}{2} \left( \sum_{(i,j) \notin \mathcal{B}} \left( \Delta_{1ij} (s_{ij} - \tilde{\Theta}_{ij}^{-1}) - \frac{1}{n} \left( -\frac{|\Delta_{1ij}|}{v_0} + \log \frac{v_0 \eta e^{\frac{|\Delta_{1ij}|}{v_0} - \frac{|\Delta_{1ij}|}{v_1}} + v_1(1-\eta)}{v_0 \eta + v_1(1-\eta)} \right) \right) \right), \\
(\text{C}) &= \frac{n}{8} k_1^2 \|\Delta_1\|_F^2 + \sum_{i \neq j, \in \mathcal{B}} \frac{1}{4} \text{pen}_{SS}''(\tilde{\theta}_{ij} + v \Delta_{1ij}) \Delta_{1ij}^2.
\end{aligned}$$

Next, we show that all three terms, (A), (B), and (C), are non-negative.

- (A) = 0 because of the way  $\tilde{\Theta}$  is constructed.

- (C)  $\geq 0$  by the property of  $\text{pen}_{SS}''(\delta)$  stated before.
- For term (B), we will first bound  $s_{ij} - \tilde{\Theta}_{ij}^{-1}$ :

$$\begin{aligned}
|s_{ij} - \tilde{\Theta}_{ij}^{-1}| &\leq |s_{ij} - \sigma_{ij}^0| + |\tilde{\Theta}_{ij}^{-1} - \sigma_{ij}^0| \\
&\leq C_1 \sqrt{\frac{\log p}{n}} + M_{\Sigma^0}^2 2(C_1 + C_3) M_{\Gamma^0} \sqrt{\frac{\log p}{n}} + \frac{3}{2} d M_{\Sigma^0}^3 \left( 2(C_1 + C_3) M_{\Gamma^0} \sqrt{\frac{\log p}{n}} \right)^2 \\
&\leq (C_1 + M_{\Sigma^0}^2 2(C_1 + C_3) M_{\Gamma^0} + 6(C_1 + C_3)^2 d M_{\Gamma^0}^2 M_{\Sigma^0}^3 / M) \sqrt{\frac{\log p}{n}},
\end{aligned}$$

where the second line is due to Lemma 2.

Next, we bound the fraction after the log function in (B). For simplicity, denote it by  $f(\Delta_{1ij})$ . Since  $1/v_0 - 1/v_1 > 0$ ,  $f(\Delta_{1ij})$  is a monotone function of  $\Delta_{1ij}$  and  $f(\Delta_{1ij})$  goes to 1 as  $\Delta_{1ij}$  goes to 0. That is,  $f(\Delta_{1ij})$  can be arbitrary close to 0, when  $\Delta_{1ij}$  is sufficiently small. Therefore the second term after summation can be arbitrary close to  $\Delta_{1ij}/(nv_0)$ .

So if choosing  $1/(nv_0) > C_1 + M_{\Sigma^0}^2 2(C_1 + C_3) M_{\Gamma^0} + 6(C_1 + C_3)^2 d M_{\Gamma^0}^2 M_{\Sigma^0}^3 / M$  and  $\epsilon > 0$  sufficiently small, we have (B)  $> 0$  when  $\|\Delta_1\|_\infty \leq \epsilon$ .

Combining the results above, we have shown that there always exists a small  $\epsilon > 0$ , such that  $G(\Delta_1) \geq 0$  for any  $\|\Delta_1\|_\infty \leq \epsilon$ . That is,  $\tilde{\Theta}$  is a local minimizer. So we have proved Theorem A.  $\square$

**Proof of Theorem 2.** Cai et al. (2011) have shown that the sample noise  $\tilde{W}$  can be bounded by  $\sqrt{\frac{\log p}{n}}$  times a constant with high probability for both exponential tail and polynomial tail (see the proofs of their Theorem 1 and 4). That is,

- When condition (C1) holds,

$$\|\tilde{W}\|_\infty \leq \eta_1^{-1} (2 + \tau_0 + \eta_1^{-1} K^2) \sqrt{\frac{\log p}{n}}$$

with probability greater than  $1 - 2p^{-\tau_0}$ .

- When condition (C2) holds,

$$\|\tilde{W}\|_\infty \leq \sqrt{(\theta_{max}^0 + 1)(4 + \tau_0) \frac{\log p}{n}}, \quad \theta_{max}^0 = \max_{ij} \theta_{ij},$$

with probability greater than  $1 - O(n^{-\delta_0/8} + p^{-\tau_0/2})$ .

With the results above on  $\|\tilde{W}\|_\infty$  and Theorem A, we have proven Theorem 2.  $\square$

## Appendix B: Other Proofs

**Proof of Lemma 1.** Show both  $\|\Delta_{\mathcal{B}}\|_\infty$  and  $\|\Delta_{\mathcal{B}^c}\|_\infty$  are bounded by  $r$ . Thus,  $\|\Delta\|_\infty \leq r$ .

1. By construction,

$$\|\Delta_{\mathcal{B}^c}\|_\infty \leq 2(C_1 + C_3)M_{\Gamma^0} \sqrt{\log p/n} \leq r.$$

2. The proof for  $\|\Delta_{\mathcal{B}}\|_\infty \leq r$  is inspired by Ravikumar et al. (2011). Define  $G(\Theta_{\mathcal{B}}) = n(-\Theta_{\mathcal{B}}^{-1} + S_{\mathcal{B}})/2 + Z_{\mathcal{B}}$ . By definition, the set of  $\Theta_{\mathcal{B}}$  that satisfies  $G(\Theta_{\mathcal{B}}) = 0$  is the set  $\mathcal{A}$ . Consider a mapping  $F$  from  $\mathbb{R}^{|\mathcal{B}|} \rightarrow \mathbb{R}^{|\mathcal{B}|}$ :

$$F(\text{vec}(\Delta_{\mathcal{B}})) = \frac{2}{n} \left( -\Gamma_{\mathcal{B}\mathcal{B}}^{0-1} \text{vec}(G(\Theta_{\mathcal{B}}^0 + \Delta_{\mathcal{B}})) \right) + \text{vec}(\Delta_{\mathcal{B}}). \quad (9)$$

By construction,  $F(\text{vec}(\Delta_{\mathcal{B}})) = \text{vec}(\Delta_{\mathcal{B}})$  if and only if  $G(\Theta_{\mathcal{B}}^0 + \Delta_{\mathcal{B}}) = G(\Theta_{\mathcal{B}}) = 0$ .

Let  $\mathbb{B}(r)$  denote the  $\ell_\infty$  ball in  $\mathbb{R}^{|\mathcal{B}|}$ . If we could show that  $F(\mathbb{B}(r)) \subseteq \mathbb{B}(r)$ , then because  $F$  is continuous and  $\mathbb{B}(r)$  is convex and compact, by Brouwer's fixed point theorem, there exists a fixed point  $\text{vec}(\Delta_{\mathcal{B}}) \in \mathbb{B}(r)$ . Thus  $\|\Delta_{\mathcal{B}}\|_\infty \leq r$ .

Let  $\Delta \in \mathbb{R}^{p \times p}$  denote the zero-padded matrix, equal to  $\Delta_{\mathcal{B}}$  on  $\mathcal{B}$  and zero on  $\mathcal{B}^c$ .

$$\begin{aligned} F(\text{vec}(\Delta_{\mathcal{B}})) &= \frac{2}{n} \left( -\Gamma_{\mathcal{B}\mathcal{B}}^{0-1} \text{vec}(G(\Theta_{\mathcal{B}}^0 + \Delta_{\mathcal{B}})) \right) + \text{vec}(\Delta_{\mathcal{B}}) \\ &= -\Gamma_{\mathcal{B}\mathcal{B}}^{0-1} \left( (-(\Theta^0 + \Delta)_{\mathcal{B}}^{-1} + S_{\mathcal{B}}) + \frac{2}{n} Z_{\mathcal{B}} \right) + \text{vec}(\Delta_{\mathcal{B}}) \\ &= -\Gamma_{\mathcal{B}\mathcal{B}}^{0-1} \left( -(\Theta^0 + \Delta)_{\mathcal{B}}^{-1} + \Theta_{\mathcal{B}}^{0-1} - \Theta_{\mathcal{B}}^{0-1} + S_{\mathcal{B}} + \frac{2}{n} Z_{\mathcal{B}} \right) + \text{vec}(\Delta_{\mathcal{B}}) \\ &= \Gamma_{\mathcal{B}\mathcal{B}}^{0-1} \text{vec} \left( \Theta^{0-1} \Delta \Theta^{0-1} \Delta J \Theta^{0-1} \right)_{\mathcal{B}} - \Gamma_{\mathcal{B}\mathcal{B}}^{0-1} \left( \text{vec} \left( W_{\mathcal{B}} + \frac{2}{n} Z_{\mathcal{B}} \right) \right). \end{aligned}$$

Denote

$$\begin{aligned}\mathbf{I} &= \Gamma_{\mathcal{B}\mathcal{B}}^{0^{-1}} \text{vec} \left( \Theta^{0^{-1}} \Delta \Theta^{0^{-1}} \Delta J \Theta^{0^{-1}} \right)_{\mathcal{B}} \\ \mathbf{II} &= \Gamma_{\mathcal{B}\mathcal{B}}^{0^{-1}} \left( \text{vec} \left( W_{\mathcal{B}} + \frac{2}{n} Z_{\mathcal{B}} \right) \right).\end{aligned}$$

Then  $F(\text{vec}(\Delta_{\mathcal{B}})) \leq \|\mathbf{I}\|_{\infty} + \|\mathbf{II}\|_{\infty}$ . So it suffices to show  $\|\mathbf{I}\|_{\infty} + \|\mathbf{II}\|_{\infty} \leq r$ .

For the first relationship, we have

$$\begin{aligned}\|\mathbf{I}\|_{\infty} &\leq \left\| \left\| \Gamma_{\mathcal{B}\mathcal{B}}^{0^{-1}} \right\|_{\infty} \left\| \text{vec}(\Theta^{0^{-1}} \Delta \Theta^{0^{-1}} \Delta J \Theta^{0^{-1}})_{\mathcal{B}} \right\|_{\infty} \right\|_{\infty} \\ &\leq M_{\Gamma^0} \|R(\Delta)\|_{\infty} \\ &\leq \frac{3}{2} d M_{\Gamma^0} M_{\Sigma^0}^3 \|\Delta\|_{\infty}^2,\end{aligned}$$

where the last inequality is due to  $\|\Delta\|_{\infty} \leq r \leq 1/(3M_{\Sigma^0}d)$  and Lemma 5 from [Ravikumar et al. \(2011\)](#). Since  $r \leq 1/(3dM_{\Gamma^0}M_{\Sigma^0}^3)$ , we further have  $\|\mathbf{I}\|_{\infty} \leq r/2$ .

By assumption,  $\min |\theta_{\mathcal{B} \cap \mathcal{D}^c}^0| \geq r + \delta$ , thus when  $\|\Delta\|_{\infty} \leq r$ ,  $\min |\theta_{\mathcal{B} \cap \mathcal{D}^c}| \geq \delta$ , since  $\text{pen}'_{SS}(|\theta|)$  is monotonic decreasing, we have  $\|Z_{\mathcal{B} \cap \mathcal{D}^c}\|_{\infty} \leq \frac{1}{2} \text{pen}'_{SS}(\delta)$ . Thus, for the second relationship, we have

$$\begin{aligned}\|\mathbf{II}\|_{\infty} &\leq \Gamma_{\mathcal{B}\mathcal{B}}^{0^{-1}} \left( \|W\|_{\infty} + \frac{2}{n} \max \left( \frac{1}{2} \text{pen}'_{SS}(\delta), \tau \right) \right) \\ &\leq M_{\Gamma^0} \left( \|W\|_{\infty} + \frac{2}{n} \max \left( \frac{1}{2} \text{pen}'_{SS}(\delta), \tau \right) \right) \leq r/2\end{aligned}$$

by assumption.

Thus, there exists a point  $\tilde{\Theta}$  such that  $\|\tilde{\Theta} - \Theta^0\|_{\infty} \leq r$ .

Because  $\|\tilde{\Theta}\|_2 \leq \|\tilde{\Theta} - \Theta^0\|_2 + \|\Theta^0\|_2$  and  $\|\tilde{\Theta} - \Theta^0\|_2 \leq \left\| \left\| \tilde{\Theta} - \Theta^0 \right\|_{\infty} \right\|_{\infty} \leq dr$ , we have  $\|\tilde{\Theta}\|_2 \leq 1/k_1 + dr < B$ . Because  $dr < \frac{1}{3M_{\Sigma^0}} < \frac{1}{3}\lambda_{\min}(\Theta^0)$ , we have  $\lambda_{\min}(\tilde{\Theta}) > 0$ . So it is inside  $\mathcal{A}$  by assumption. That is,  $\mathcal{A}$  is non empty.  $\square$

**Proof of Lemma 2.** Since there are only  $p + s$  nonzero entries, we prove (2):

$$\|\tilde{\Theta} - \Theta^0\|_F = \sqrt{\sum_{(i,j) \in S_g} (\tilde{\theta}_{ij} - \theta_{ij}^0)^2} \leq r\sqrt{p+s}.$$

Since there are at most  $d$  nonzero entries in each column of  $\Theta$  and  $\Theta$  is symmetric,

$$\|\tilde{\Theta} - \Theta^0\|_2 \leq \left\| \left\| \tilde{\Theta} - \Theta^0 \right\|_\infty \right\| \leq rd.$$

In addition, since the  $\ell_\infty/\ell_\infty$  operator norm is bounded by Frobenius norm, we prove (3). We skip the proof for (4), which is nearly identical to Corollary 4 in Ravikumar et al. (2008).  $\square$

**Proof of Theorem 4.** (Selection consistency)

Recall

$$\begin{aligned} \log \frac{p_{ij}}{1 - p_{ij}} &= \left( \log \frac{v_0 \eta}{v_1(1 - \eta)} - \frac{|\tilde{\theta}_{ij}|}{v_1} + \frac{|\tilde{\theta}_{ij}|}{v_0} \right) \\ &= \left( -\log \frac{v_1(1 - \eta)}{v_0 \eta} - \frac{|\tilde{\theta}_{ij}|}{v_1} + \frac{|\tilde{\theta}_{ij}|}{v_0} \right). \end{aligned} \quad (10)$$

- When  $\theta_{ij}^0 = 0$ , by constructor,  $\tilde{\theta}_{ij} = 0$ . Then with our choice of  $v_1(1 - \eta)/(v_0 \eta)$ ,

$$\log \frac{p_{ij}}{1 - p_{ij}} \rightarrow -\infty.$$

- When  $\theta_{ij}^0 \neq 0$ , we have

$$\begin{aligned} \log \frac{p_{ij}}{1 - p_{ij}} &= \left( \log \frac{v_0 \eta}{v_1(1 - \eta)} - \frac{|\theta_{ij}|}{v_1} + \frac{|\theta_{ij}|}{v_0} \right) \\ &\geq \left( -\log \frac{v_1(1 - \eta)}{v_0 \eta} + \left( \frac{1}{v_0} - \frac{1}{v_1} \right) (|\theta_{ij}^0| - |\theta_{ij}^0 - \theta_{ij}|) \right) \\ &\geq -\log \frac{v_1(1 - \eta)}{v_0 \eta} + (C_4 - C_3) (K_0 - 2(C_1 + C_3)M_{\Gamma^0}) \log p. \end{aligned} \quad (11)$$

Then with our choice of  $v_1(1 - \eta)/(v_0 \eta)$ ,

$$\log \frac{p_{ij}}{1 - p_{ij}} \rightarrow +\infty.$$

$\square$

**Proof of Theorem 5.** The estimate of the precision matrix is symmetric due to construction.

Next we show that the estimate is ensured to be positive definite. Assume  $\Theta^{(t)}$ , the  $t$ -th update of the estimate is positive definite. Apparently, this assumption is satisfied with  $t = 0$  since the initial estimate  $\Theta^{(0)}$  is positive definite.

Then it suffices to show that  $\det(\Theta^{(t+1)}) \succ 0$ . WLOG, assume we update the last column of  $\Theta$  in the  $(t + 1)$ -th iteration. Using Schur complements, we have

$$\det(\Theta^{(t+1)}) = \det\left(\Theta_{11}^{(t)}\right) \left(\theta_{22}^{(t+1)} - \theta_{12}^{(t+1)T} \Theta_{11}^{(t)-1} \theta_{12}^{(t+1)}\right).$$

Because  $\det(\Theta^{(t)}) \succ 0$ , we have  $\det\left(\Theta_{11}^{(t)}\right) > 0$ . Further, the updating rule of our algorithm ensures that

$$\left(\theta_{22}^{(t+1)} - \theta_{12}^{(t+1)T} \Theta_{11}^{(t)-1} \theta_{12}^{(t+1)}\right) = \frac{1}{w_{22}^{(t+1)}} > 0.$$

Thus,  $\det(\Theta^{(t+1)}) > 0$ . □

## Appendix C: Checking $\|\Theta\|_2 \leq B$ .

Algorithm 1 involves checking the spectral norm constraint  $\|\Theta\|_2 \leq B$  after every column update of  $\Theta$ . Computing  $\|\Theta\|_2$  can be computationally intensive, however, since we only change one column (and corresponding one row) at a time, the constraint can be checked without calculating  $\|\Theta\|_2$  every time. Suppose we know  $\|\Theta^{(t)}\|_2$  (or an upper bound) at the previous step, and denote  $\Delta^{(t)} := \Theta^{(t+1)} - \Theta^{(t)}$  to be the difference between the estimates after one column update. In order to check the bound, it is sufficient to make sure that  $\|\Theta^{(t)}\|_2 + \|\Delta^{(t)}\|_2 < B$ . It is easy to check this constraint because  $\|\Delta^{(t)}\|_2$  is a rank two matrix with its maximum eigenvalue available in closed form. Only when  $\|\Theta^{(t)}\|_2 + \|\Delta\|_2$  exceeds  $B$ , we will need to recalculate  $\|\Theta^{(t+1)}\|_2$  again.

## References

Cai, T., Liu, W., and Luo, X. (2011). A constrained  $\ell_1$  minimization approach to sparse precision matrix estimation. *Journal of the American Statistical Association*, 106(494):594–607.

- Ravikumar, P., Wainwright, M. J., Raskutti, G., and Yu, B. (2008). High-dimensional covariance estimation by minimizing  $\ell_1$ -penalized log-determinant divergence. *arXiv preprint arXiv:0811.3628*.
- Ravikumar, P., Wainwright, M. J., Raskutti, G., and Yu, B. (2011). High-dimensional covariance estimation by minimizing  $\ell_1$ -penalized log-determinant divergence. *Electronic Journal of Statistics*, 5:935–980.
- Rothman, A. J., Bickel, P. J., Levina, E., Zhu, J., et al. (2008). Sparse permutation invariant covariance estimation. *Electronic Journal of Statistics*, 2:494–515.
