# Supplementary material
Source: publisher figshare collection journal article supplement (https://tandf.figshare.com/ndownloader/files/18112394)
Supplement: Supplementary file 2 [file 18112394]

Archive with 2 entries (2 files):
- UASA_A_1482755_Supplement/appendix.pdf
- UASA_A_1482755_Supplement/Bagus.zip
